# Supplementary material for: Bioaccessibility and Antioxidant Activity of Polyphenols from Pigmented Barley and Wheat
Source: MDPI journal article supplement (doi:10.3390/foods11223697), 2022-11-18
Supplement: s1 [file s1]

# Bioaccessibility and antioxidant activity of polyphenols from pigmented barley and wheat

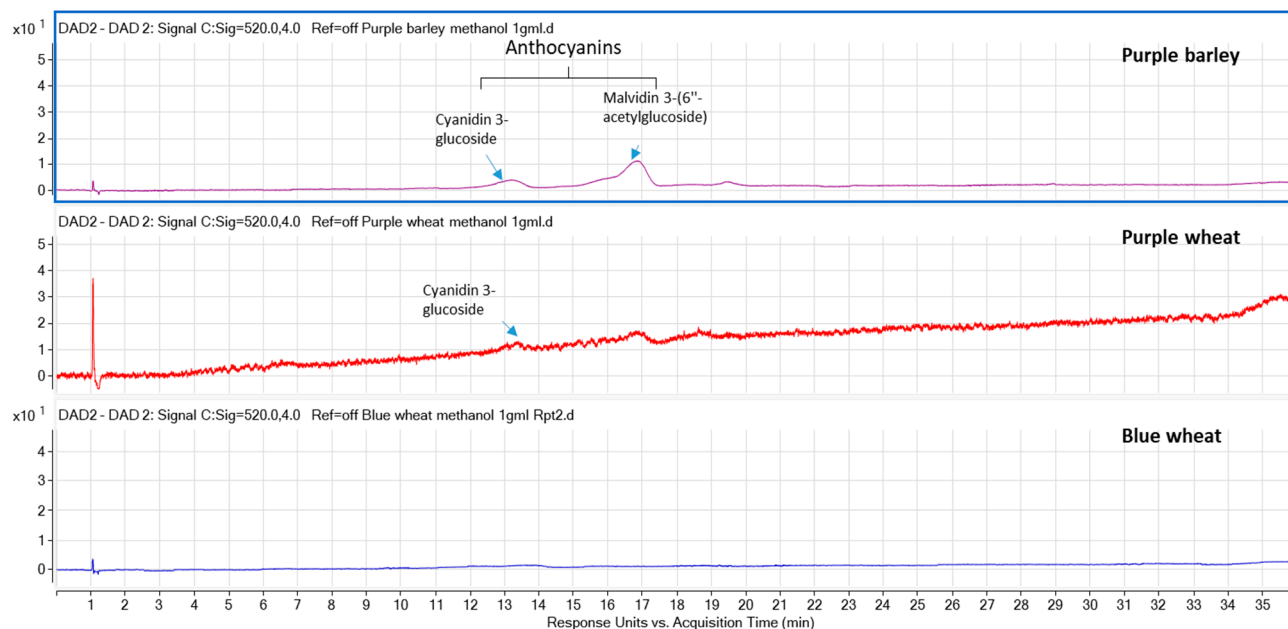

**Figure S1.** Chromatograms at 520 nm highlighting anthocyanin compounds in the methanol extracts of pigmented cereals. Purple line: purple barley anthocyanin profile; Red line: purple wheat anthocyanin profile; Blue line: blue wheat anthocyanin profile.

## A. Purple barley

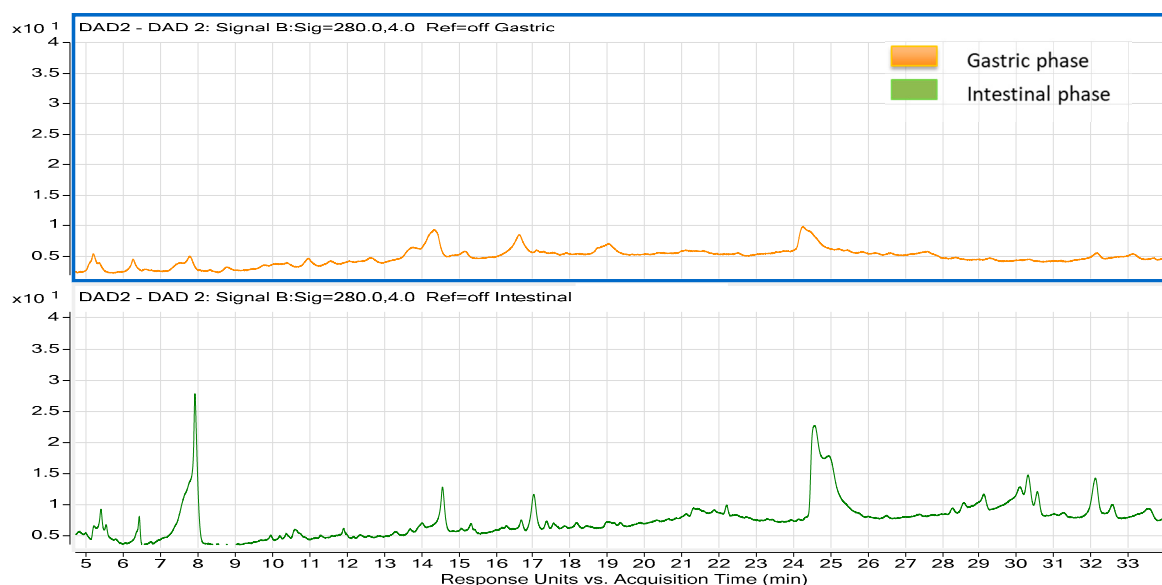

## B. Purple Wheat

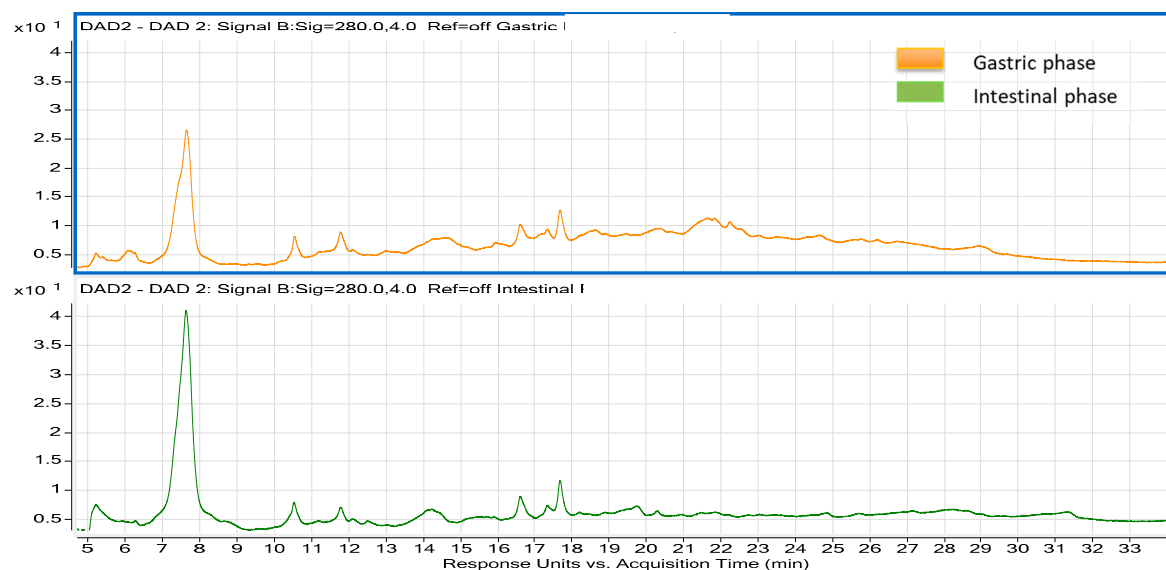

## C. Blue Wheat

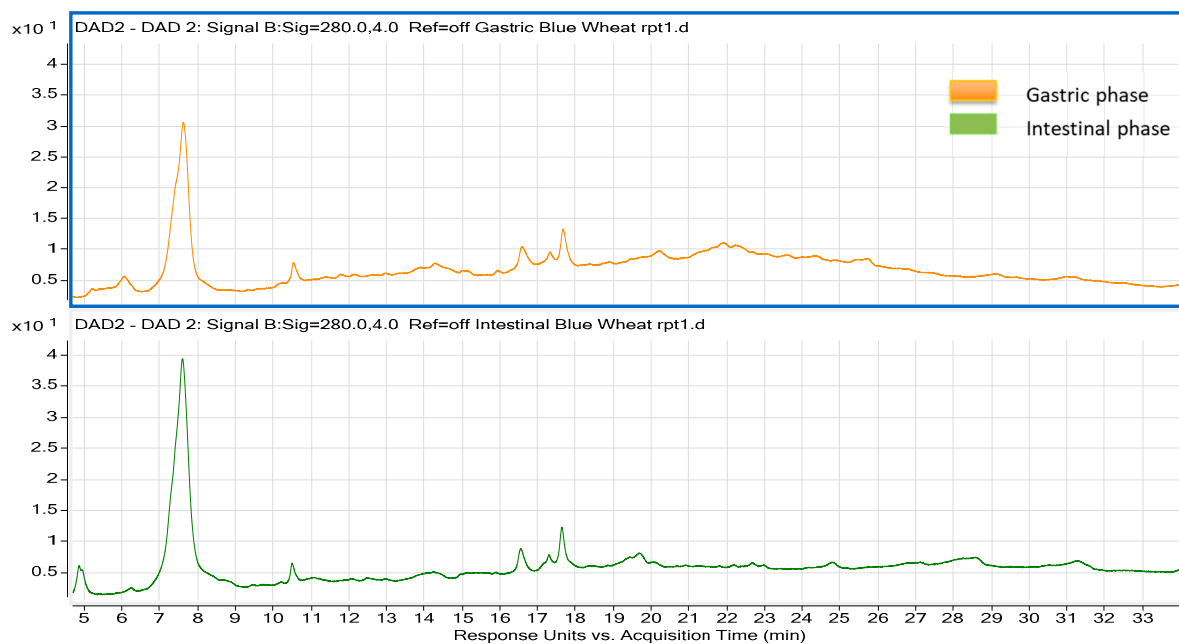

**Figure S2.** Annotated chromatograms of pigmented wheat flour from **gastric** and **intestinal** phases of digestion

**Table S1.** Table of unidentified compounds from methanol extraction

| Peak | RT<br>(mins) | $\Lambda_{\max}$<br>(nm) | $m/z$    | Phenolic quantification (mg GAE/100 g dw ) |                   |                   |
|------|--------------|--------------------------|----------|--------------------------------------------|-------------------|-------------------|
|      |              |                          |          | Purple Barley                              | Purple Wheat      | Blue Wheat        |
| P2   | 6.6          | 280                      | 671.2026 | $0.97 \pm 0^a$                             | $0.54 \pm 0^c$    | $0.67 \pm 0.04^b$ |
| P3   | 7.1          | 280                      | 655.2132 | –                                          | $0.06 \pm 0^a$    | $0.06 \pm 0^a$    |
| P5 * | 8.4          | 280                      | 203.0839 | $0.33 \pm 0.06^c$                          | $5.81 \pm 0.04^a$ | $5.39 \pm 0.07^b$ |
| P6   | 8.9          | 280                      | 451.1238 | $0.04 \pm 0$                               | –                 | –                 |
| P8   | 10.5         | 300                      | 323.1354 | $0.1 \pm 0.04$                             | –                 | –                 |
| P9   | 11.1         | 280                      | 472.1578 | –                                          | $0.15 \pm 0.01$   | –                 |
| P10  | 11.7         | 255, 285                 | 504.1444 | –                                          | $0.89 \pm 0.01$   | –                 |
| P14  | 14.5         | 280, 320                 | 307.1393 | –                                          | $0.07 \pm 0.01$   | –                 |
| P15  | 14.8         | 320                      | 787.3615 | $1.62 \pm 0.27$                            | –                 | –                 |
| P16  | 15.5         | 310                      | 413.1087 | –                                          | –                 | $0.13 \pm 0$      |
| P17  | 15.7         | 320                      | 817.3733 | $0.22 \pm 0.02$                            | –                 | –                 |
| P18  | 16.5         | 350                      | 366.1199 | –                                          | –                 | $0.1 \pm 0.02$    |
| P21* | 17.5         | 320                      | 537.3072 | –                                          | –                 | $0.13 \pm 0.05$   |
| P24  | 20.0         | 320                      | 452.2184 | –                                          | –                 | $0.17 \pm 0.01$   |

Data are the means  $\pm$  SD (n = 3). Different alphabets in each row indicates a significant difference in phenolic content. Gallic acid equivalent: GAE; Mass to charge ration:  $m/z$ ; – not detected; RT: retention time

\* P5 tentatively identified as the amino phenolic compound tryptophan based on study by (Podio et al., 2019)

\* Ferulic acid was identified by mass spectra (193.0578) at 17.5 mins but not quantifiable as its UHPLC peak was masked by the other compound eluting at the same time.
